# Supplementary material for: Expanded graphite/NiAl layered double hydroxide nanowires for ultra-sensitive, ultra-low detection limits and selective NOx gas detection at room temperature
Source: Royal Society of Chemistry journal article supplement (doi:10.1039/c9ra00526a), 2019-01-01
Supplement: c9ra00526a1.pdf [file c9ra00526a1.pdf]

## Supporting Information

### **Expanded graphite/NiAl layered double hydroxide nanowires for ultra-sensitive, ultra-low detection limits and selective NO<sub>x</sub> gas detection at room temperature**

*Xueying Zhang<sup>a</sup>, Muhammad Ikram<sup>a</sup>, Zhi Liu<sup>a</sup>, Lei Teng<sup>a</sup>, Jialing Xue<sup>a</sup>, Di Wang<sup>a</sup>, Li  
Li<sup>\*a,b</sup>, Keying Shi<sup>\*a,c</sup>*

<sup>a</sup> Key Laboratory of Functional Inorganic Material Chemistry, Ministry of Education,  
School of Chemistry and Material Science, Heilongjiang University, Harbin, 150080,  
P. R. China.

<sup>b</sup> Key Laboratory of Chemical Engineering Process & Technology for High-efficiency  
Conversion, Heilongjiang University, Harbin, 150080, P. R. China.

<sup>c</sup> Key Laboratory for Photonic and Electronic, Ministry of Education, Modern  
Experiment Center, Harbin Normal University, Harbin 150025, P. R. China.

\* Corresponding author

E-mail: shikeying2008@163.com; lili1993036@hlju.edu.cn

Fax: +86 4518667 3647; Tel: +86 451 8660 9141

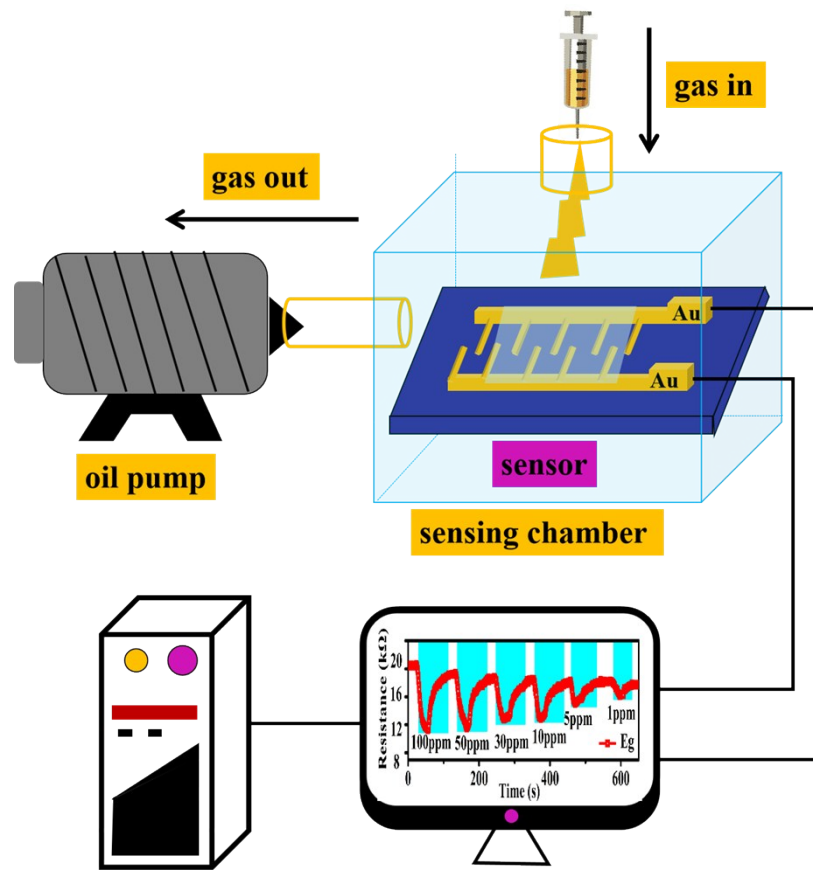

**Fig. S1.** Gas sensing tests of thin-film sensors.

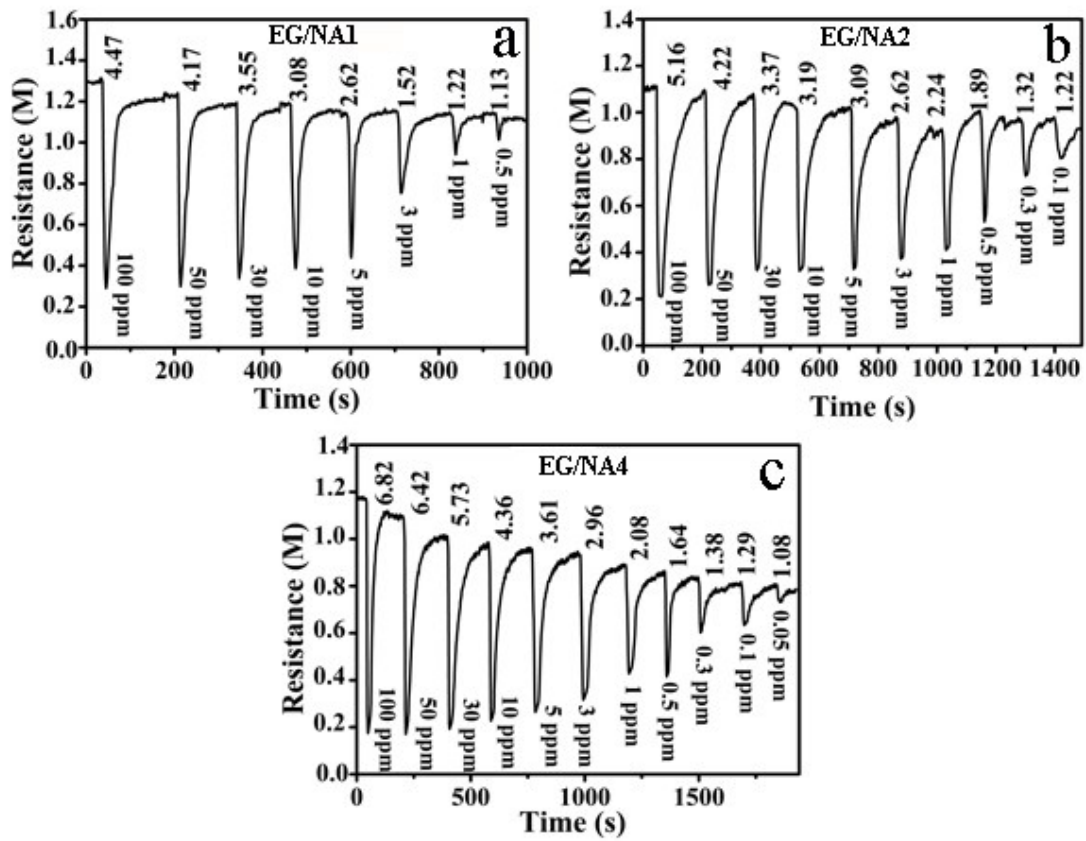

**Fig. S2** Dynamical response-recovery curves of (a) EG/NA1, (b) EG/NA2, and (c) EG/NA4 towards NO<sub>x</sub> at RT ( $24 \pm 2$  °C).

**Table S1** Response and response time of EG/NA samples to NO<sub>x</sub> at RT (24 ± 2 °C).

| Sample                | EG/NA1 |     | EG/NA2 |     | EG/NA3 |     | EG/NA4 |     |
|-----------------------|--------|-----|--------|-----|--------|-----|--------|-----|
|                       | R      | T/s | R      | T/s | R      | T/s | R      | T/s |
| NO <sub>x</sub> (ppm) |        |     |        |     |        |     |        |     |
| 100                   | 4.47   | 6.0 | 5.16   | 5.3 | 17.65  | 2.0 | 6.82   | 8.6 |
| 50                    | 4.17   | 6.6 | 4.22   | 5.6 | 13.43  | 4.6 | 6.42   | 9.3 |
| 30                    | 3.55   | 7.3 | 3.37   | 6.0 | 8.99   | 4.6 | 5.73   | 9.3 |
| 10                    | 3.08   | 7.3 | 3.19   | 4.6 | 5.71   | 4.0 | 4.36   | 8.0 |
| 5                     | 2.62   | 8.0 | 3.09   | 7.3 | 4.32   | 6.0 | 3.61   | 8.6 |
| 3                     | 1.52   | 7.3 | 2.62   | 8.0 | 3.36   | 6.6 | 2.96   | 9.0 |
| 1                     | 1.22   | 6.6 | 2.24   | 7.3 | 2.23   | 5.3 | 2.08   | 8.6 |
| 0.5                   | 1.13   | 6.6 | 1.89   | 6.0 | 1.84   | 5.3 | 1.64   | 9.3 |
| 0.3                   | --     | --  | 1.32   | 6.0 | 1.63   | 3.3 | 1.38   | 10  |
| 0.1                   | --     | --  | 1.22   | 5.3 | 1.56   | 4.0 | 1.29   | 8.0 |
| 0.05                  | --     | --  | --     | --  | 1.51   | 5.3 | 1.08   | 7.3 |
| 0.03                  | --     | --  | --     | --  | 1.39   | 5.3 | --     | --  |
| 0.01                  | --     | --  | --     | --  | 1.27   | 6.0 | --     | --  |

R: Response; T: Response time.

**Table S2** Response, response time and recovery time of EG, NiAl-LDH and EG/NA3 samples to NO<sub>x</sub> at RT (24 ± 2 °C).

| Sample                | EG   |                   |                   | EG/NA3 |                   |                   | NiAl-LDH |                   |                   |
|-----------------------|------|-------------------|-------------------|--------|-------------------|-------------------|----------|-------------------|-------------------|
| NO <sub>x</sub> (ppm) | R    | T <sub>1</sub> /s | T <sub>2</sub> /s | R      | T <sub>1</sub> /s | T <sub>2</sub> /s | R        | T <sub>1</sub> /s | T <sub>2</sub> /s |
| 100                   | 2.44 | 7.3               | 13.3              | 17.65  | 2.0               | 9.3               | 3.42     | 9.3               | 14                |
| 50                    | 2.19 | 7.3               | 14.6              | 13.43  | 4.6               | 10                | 3.03     | 8.0               | 15.3              |
| 30                    | 2.01 | 8.6               | 14.6              | 8.99   | 4.6               | 10                | 2.69     | 7.3               | 15.3              |
| 10                    | 1.53 | 8.6               | 13.3              | 5.58   | 4.0               | 10.3              | 1.97     | 6.0               | 13.3              |
| 5                     | 1.42 | 6.0               | 10.6              | 4.14   | 6.0               | 12.6              | 1.80     | 7.3               | 13.6              |
| 3                     | 1.16 | 6.3               | 10.6              | 3.29   | 6.6               | 14                | 1.64     | 6.0               | 12                |
| 1                     | --   | --                | --                | 2.23   | 5.3               | 14                | 1.37     | 6.6               | 9.6               |
| 0.5                   | --   | --                | --                | 1.76   | 5.3               | 12.6              | --       | --                | --                |
| 0.3                   | --   | --                | --                | 1.56   | 3.3               | 10                | --       | --                | --                |
| 0.1                   | --   | --                | --                | 1.45   | 4.0               | 10                | --       | --                | --                |
| 0.05                  | --   | --                | --                | 1.37   | 5.3               | 9.6               | --       | --                | --                |
| 0.03                  | --   | --                | --                | 1.28   | 5.3               | 9.6               | --       | --                | --                |
| 0.01                  | --   | --                | --                | 1.18   | 6.0               | 8.3               | --       | --                | --                |

R: Response; T<sub>1</sub>: Response time; T<sub>2</sub>: Recovery time.

**Table S3** Carrier concentrations and fitted impedance parameters of EG, EG/NA3 and NiAl-LDH samples.

| Samples  | $R_{\Omega}$ ( $\Omega$ ) | C ( $F\text{ cm}^{-2}$ ) | $R_{ct}$ ( $\Omega$ ) |
|----------|---------------------------|--------------------------|-----------------------|
| EG       | 409.2                     | $4.56 \times 10^{-6}$    | 394.3                 |
| EG/NA3   | 1415                      | $7.81 \times 10^{-7}$    | 975.5                 |
| NiAl-LDH | 4294                      | $2.01 \times 10^{-6}$    | 1931                  |
